# Supplementary material for: Pilot trial of perampanel on peritumoral hyperexcitability and clinical outcomes in newly diagnosed high-grade glioma
Source: bioRxiv or medRxiv preprint supplement (doi:10.1101/2024.04.11.24305666), 2024-04-18
Supplement: Supplementary file [file media-1.pdf]

## Supplementary Data

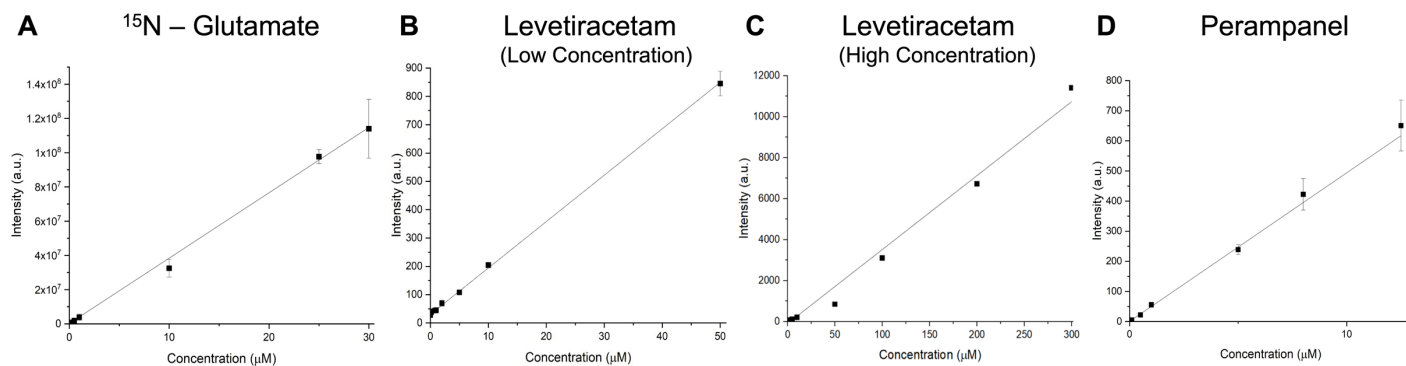

**Supplementary Figure 1. MALDI Calibration Curves.** (A)  $^{15}\text{N}_1$  – glutamate, normalized to internal standard ( $\text{IS}$ )  $\text{D}_5$  – glutamate. (B,C) Levetiracetam; low concentration (B) and high concentration (C), normalized to  $\text{IS}$   $\text{D}_6$  – levetiracetam. (D) Perampanel, normalized to  $\text{IS}$  panobinostat. All calibration curves were calculated using a weighted linear regression ( $1/x^2$ ).

|             |         |           |         |            |           |            |
|-------------|---------|-----------|---------|------------|-----------|------------|
| <b>LLOQ</b> | 0.71 µM | 0.0025 µM | 0.12 µM | 0.00025 µM | 0.0005 µM | 0.00025 µM |
| <b>LOD</b>  | 0.21 µM | 0.0025 µM | 0.03 µM | 0.00025 µM | 0.0017 µM | 0.00025 µM |
|             |         |           |         |            |           |            |

|                   | Levetiracetam Conc. (µM) |          | Perampanel Conc. (µM) |          | Glutamate Conc. (mM) |          | Lactate/Pyruvate Ratios |
|-------------------|--------------------------|----------|-----------------------|----------|----------------------|----------|-------------------------|
| Patient ID        | MALDI-ToF                | LC-MS/MS | MALDI-ToF             | LC-MS/MS | MALDI-FTICR          | LC-MS/MS | MALDI-FTICR             |
| Case 1 sample 1a  | 99.78                    | 172.00   | 0.17                  | 1.43     | 4.51                 | 5.68     | 19.1                    |
| Case 1 sample 3c  | 143.28                   | 178.00   | 0.16                  | 1.44     | 4.06                 | 7.48     | 22.7                    |
| Case 1 sample 4d  | 174.11                   | 165.00   | 0.25                  | 0.87     | 1.52                 | 3.36     | 23.2                    |
| Case 1 sample 5e  | 123.38                   | 151.00   | 0.19                  | 1.51     | 1.62                 | 5.04     | 17.9                    |
| Case 1 sample 6f  | 99.18                    | 160.00   | 0.22                  | 0.86     | 0.70                 | 1.58     | 19.1                    |
| Case 2 sample 1a  | 2.65                     | 1.95     | 0.17                  | 0.25     | 3.81                 | 5.35     | 3.6                     |
| Case 2 sample 2b  | 2.47                     | 5.65     | 0.17                  | 0.20     | 4.77                 | 1.44     | 2.8                     |
| Case 2 sample 3c  | 1.48                     | 3.61     | 0.17                  | 0.10     | 3.86                 | 1.49     | 5.1                     |
| Case 2 sample 4d  | 0.37                     | 0.19     | 0.24                  | 0.62     | 3.06                 | 4.61     | 4.6                     |
| Case 3 sample 1a  | 43.99                    | 56.17    | NA                    | NA       | 9.21                 | 9.90     | 6.4                     |
| Case 3 sample 2b  | 27.22                    | 45.80    | NA                    | NA       | 7.82                 | 4.00     | 8.4                     |
| Case 3 sample 3c  | 29.31                    | 11.90    | NA                    | NA       | 3.19                 | 6.24     | 2.5                     |
| Case 3 sample 4d  | 66.55                    | 88.20    | NA                    | NA       | 3.40                 | 6.78     | 11                      |
| Case 4 sample 1a  | 7.68                     | 6.56     | 0.20                  | 0.00     | 1.22                 | 0.66     | 14.7                    |
| Case 4 sample 2b  | 7.12                     | 9.60     | 0.20                  | 0.00     | 2.41                 | 3.07     | 13.2                    |
| Case 4 sample 3c  | 6.20                     | 6.01     | 0.18                  | 0.00     | 0.23                 | 4.09     | 6.3                     |
| Case 5 sample 1a  | 40.95                    | NA       | NA                    | NA       | 1.37                 | NA       | 8.6                     |
| Case 5 sample 2b  | 39.92                    | 12.20    | NA                    | NA       | 1.60                 | 0.69     | 7.8                     |
| Case 5 sample 3c  | 99.00                    | 149.00   | NA                    | NA       | 2.46                 | 1.09     | 19                      |
| Case 6 sample 1a  | 2.84                     | 1.05     | 0.04                  | 0.03     | 0.16                 | 4.48     | 1                       |
| Case 6 sample 2b  | 2.36                     | 2.45     | 0.04                  | 0.00     | 0.25                 | 4.51     | 1.3                     |
| Case 6 sample 4d  | 1.05                     | 0.36     | 0.00                  | 0.00     | 0.28                 | 1.31     | 0.9                     |
| Case 6 sample Frz | 9.11                     | 13.10    | 0.10                  | 0.23     | 1.02                 | 0.38     | 1.7                     |
| Case 7 sample 1a  | 22.73                    | 21.90    | 0.12                  | 0.00     | 8.49                 | 8.80     | 2.2                     |
| Case 7 sample 2b  | 39.57                    | 27.30    | 0.16                  | 0.00     | 5.34                 | 6.15     | 4.8                     |
| Case 7 sample 3c  | 30.07                    | 23.60    | 0.11                  | 0.00     | 7.47                 | 11.90    | 3.3                     |
| Case 7 sample 4d  | 15.40                    | NA       | 0.07                  | NA       | 5.40                 | NA       | 17                      |
| Case 8 sample 1a  | 71.39                    | 94.50    | NA                    | NA       | 3.14                 | 0.77     | 15.5                    |
| Case 8 sample 3c  | 76.04                    | 126.00   | NA                    | NA       | 2.47                 | 4.04     | 11.9                    |
| Case 8 sample 4d  | 54.88                    | 129.46   | NA                    | NA       | 5.50                 | 1.13     | 10.4                    |
| Case 8 sample 5e  | 62.14                    | 104.23   | NA                    | NA       | 2.54                 | 2.93     | 6.8                     |

|                   |        |        |      |      |      |      |      |
|-------------------|--------|--------|------|------|------|------|------|
| Case 8 sample 6f  | 67.29  | 116.00 | NA   | NA   | 4.75 | 4.64 | 14.8 |
| Case 9 sample 1a  | 7.14   | 15.10  | 0.16 | 0.85 | 7.16 | 4.96 | 11.6 |
| Case 9 sample 2b  | 1.71   | 6.70   | 0.14 | 1.01 | 2.85 | 6.32 | 3.4  |
| Case 9 sample 3c  | 0.00   | 1.06   | 0.12 | 0.47 | 3.54 | 2.72 | 3.6  |
| Case 9 sample 4d  | 0.40   | 2.40   | 0.15 | 0.76 | 4.02 | 3.38 | 3.3  |
| Case 9 sample 5e  | 3.00   | 9.62   | 0.14 | 1.06 | 5.60 | 4.48 | 6.1  |
| Case 10 sample 1a | 0.00   | 4.65   | 0.13 | 0.74 | 6.25 | 5.64 | 24.8 |
| Case 10 sample 2b | 0.00   | 0.33   | 0.13 | 0.56 | 1.20 | 3.02 | 7.6  |
| Case 10 sample 3c | 0.00   | 0.11   | 0.13 | 0.25 | 3.39 | 1.78 | 10.7 |
| Case 10 sample 4d | 0.44   | 0.22   | 0.16 | 0.81 | 3.54 | 3.10 | NA   |
| Case 11 sample 1a | 0.00   | 0.14   | 0.09 | 0.79 | 1.09 | 1.07 | 1.9  |
| Case 11 sample 2b | 2.42   | 0.03   | 0.11 | 0.23 | 2.48 | 2.24 | 44.8 |
| Case 11 sample 3c | 0.00   | 0.00   | 0.12 | 1.26 | 2.73 | 1.92 | 5    |
| Case 12 sample 1a | 63.24  | 111.00 | NA   | NA   | 3.39 | 1.33 | 3.7  |
| Case 12 sample 2b | 142.24 | 92.54  | NA   | NA   | 2.20 | 4.96 | 4.4  |

**Supplementary Table 1.** Mass Spectrometry Data. Cells with NA indicate exclusion due to treatment assignment or insufficient tissue for analysis. LLOQ, lower limit of quantitation; LOD, limit of detection.
